# Supplementary material for: Effects of a Lacticaseibacillus Mix on Behavioural, Biochemical, and Gut Microbial Outcomes of Male Mice following Chronic Restraint Stress
Source: MDPI journal article supplement (doi:10.3390/nu15214635), 2023-10-31
Supplement: s1 [file s1]

| Tests | Parameters         |                 | NS-PBS         | S-PBS          | NS-Probio      | S-Probio       | Kruskal-Wallis test<br>P value |
|-------|--------------------|-----------------|----------------|----------------|----------------|----------------|--------------------------------|
| OF    | Number of visits   | Periphery       | 39.00 (14.00)  | 34.50 (27.25)  | 37.50 (12.50)  | 42.00 (16.00)  | 0.339                          |
|       |                    | Centre          | 38.50 (14.00)  | 33.50 (28.25)  | 37.00 (12.50)  | 41.00 (16.25)  | 0.369                          |
|       |                    | Corners         | 58.00 (16.50)  | 59.50 (12.75)  | 57.00 (12.75)  | 58.00 (11.75)  | 0.932                          |
|       | Time (s)           | Periphery       | 306.90 (34.30) | 310.10 (46.20) | 310.10 (15.90) | 296.70 (40.00) | 0.374                          |
|       |                    | Centre          | 53.15 (34.30)  | 49.95 (46.20)  | 49.30 (28.08)  | 63.30 (40.00)  | 0.324                          |
|       |                    | Corners         | 112.1 (39.32)  | 110.6 (60.02)  | 112.2 (40.50)  | 98.90 (36.50)  | 0.305                          |
|       | Total distance (m) |                 | 26.70 (5.46)   | 26.41 (6.90)   | 26.43 (9.94)   | 27.02 (7.26)   | 0.992                          |
|       | Rearing            |                 | 39.00 (21.50)  | 20.00 (26.50)  | 29.50 (36.25)  | 14.50 (36.50)  | 0.108                          |
|       | Grooming           |                 | 1.00 (1.75)    | 1.00 (0.25)    | 1.00 (1.00)    | 1.00 (2.00)    | 0.604                          |
|       | Faeces             |                 | 6.50 (2.75)    | 7.00 (3.00)    | 6.00 (5.00)    | 6.50 (4.50)    | 0.766                          |
| EPM   | Number of visits   | % open arms     | 57.50 (18.75)  | 60.50 (33.75)  | 56.00 (21.25)  | 71.00 (15.00)  | 0.164                          |
|       |                    | Centre          | 36.50 (9.25)   | 30.00 (7.00)   | 35.50 (9.75)   | 32.00 (18.00)  | 0.064                          |
|       |                    | End of the arms | 13.00 (10.75)  | 11.50 (4.75)   | 7.50 (10.00)   | 11.00 (8.50)   | 0.366                          |
|       | Time (s)           | % open arms     | 65.05 (24.55)  | 68.85 (22.25)  | 54.85 (39.55)  | 72.00 (22.60)  | 0.422                          |
|       |                    | Centre          | 90.75 (42.10)  | 60.20 (24.75)  | 84.10 (49.30)  | 56.90 (60.65)  | 0.267                          |
|       |                    | End of the arms | 35.55 (54.00)  | 55.35 (38.87)  | 21.60 (22.21)  | 36.20 (58.15)  | 0.058                          |
|       | Head bents         | Centre          | 5.00 (5.50)    | 2.00 (5.00)    | 4.50 (7.00)    | 4.00 (5.50)    | 0.285                          |
|       |                    | Open arms       | 6.50 (5.50)    | 5.00 (13.00)   | 7.00 (10.50)   | 8.00 (11.50)   | 0.761                          |
|       | Faeces             |                 | 4.00 (3.75)    | 5.50 (4.00)    | 4.00 (2.50)    | 5.00 (2.50)    | 0.699                          |

Table S1 : Kruskal-Wallis test analysis of the results obtained in the OF and EPM tests. Results are expressed as median (interquartile range), n = 12-14.

|                           | NS-PBS           | S-PBS           | NS-Probio        | S-Probio         | Kruskal-Wallis<br>test<br>P value |
|---------------------------|------------------|-----------------|------------------|------------------|-----------------------------------|
| Serotonin (µg/ml)         | 1.7<br>(0.4)     | 1.3<br>(0.3)    | 1.6<br>(0.3)     | 1.4<br>(0.3)     | 0.0009                            |
| Kynurenin<br>(ng/ml)      | 177.6<br>(151.3) | 228.5<br>(90.8) | 197.1<br>(100.4) | 227.7<br>(121.5) | 0.70                              |
| Tryptophan<br>(µg/ml)     | 22.6<br>(10.6)   | 20.3<br>(8.5)   | 20.3<br>(11.3)   | 21.3<br>(11.7)   | 0.62                              |
| Kynurenin/Tryptophan      | 0.8<br>(0.4)     | 1.2<br>(0.4)    | 1.0<br>(0.5)     | 0.9<br>(0.5)     | 0.29                              |
| Adrenaline<br>(µg/ml)     | 3.3<br>(2.3)     | 2.0<br>(1.4)    | 2.6<br>(1.3)     | 2.7<br>(2.0)     | 0.11                              |
| Corticosterone<br>(ng/ml) | 36.1<br>(13.5)   | 35.5<br>(48.4)  | 24.9<br>(29.9)   | 126.7<br>(79.4)  | < 0.0001                          |

Table S2 : Comparison of blood markers in serum using the Kruskal-Wallis test. Results are expressed as median (interquartile range), n = 11-14.

| Brain regions        | Marker       | NS-PBS       | S-PBS        | NS-Probio    | S-Probio     | Kruskal-Wallis test<br>P value |
|----------------------|--------------|--------------|--------------|--------------|--------------|--------------------------------|
| Hypothalamus         | CRH          | 0.9<br>(0.6) | 1.2<br>(0.4) | 1.0<br>(0.4) | 1.2<br>(0.5) | 0.66                           |
| Prefrontal<br>cortex | GR           | 1.0<br>(0.4) | 1.0<br>(0.2) | 1.0<br>(0.3) | 1.0<br>(0.1) | 0.54                           |
|                      | GABAaR       | 1.0<br>(0.3) | 1.1<br>(0.3) | 1.1<br>(0.3) | 1.1<br>(0.1) | 0.66                           |
|                      | TPH2         | 1.1<br>(0.4) | 1.1<br>(0.3) | 1.1<br>(0.5) | 0.9<br>(0.2) | 0.50                           |
|                      | 5HT1AR       | 1.0<br>(0.4) | 0.9<br>(0.3) | 1.0<br>(0.4) | 0.9<br>(0.3) | 0.78                           |
|                      | SERT         | 1.1<br>(0.3) | 1.3<br>(0.5) | 1.3<br>(0.8) | 1.0<br>(0.4) | 0.24                           |
|                      | TH           | 1.1<br>(1.4) | 0.7<br>(2.1) | 0.5<br>(0.8) | 0.3<br>(1.3) | 0.51                           |
|                      | DAT          | 1.0<br>(1.3) | 0.7<br>(2.1) | 0.4<br>(0.7) | 0.3<br>(1.3) | 0.41                           |
|                      | BDNF         | 1.1<br>(0.6) | 1.1<br>(0.7) | 0.9<br>(0.4) | 1.0<br>(0.5) | 0.55                           |
|                      | CREB         | 1.1<br>(0.3) | 1.0<br>(0.1) | 0.9<br>(0.3) | 1.0<br>(0.3) | 0.14                           |
|                      | IFN $\gamma$ | 0.9<br>(0.7) | 0.8<br>(1.0) | 1.0<br>(0.7) | 0.5<br>(0.7) | 0.19                           |
|                      | IL-1 $\beta$ | 0.9<br>(0.4) | 1.0<br>(0.3) | 1.2<br>(0.8) | 1.0<br>(0.4) | 0.79                           |
|                      | TNF $\alpha$ | 1.1<br>(0.4) | 1.0<br>(0.6) | 0.8<br>(0.2) | 0.9<br>(0.7) | 0.35                           |
| Hippocampus          | GR           | 0.9<br>(0.4) | 0.8<br>(0.3) | 0.9<br>(0.2) | 0.9<br>(0.4) | 0.73                           |
|                      | GABAaR       | 1.0<br>(0.2) | 1.0<br>(0.3) | 1.0<br>(0.4) | 1.0<br>(0.5) | 0.90                           |
|                      | TPH2         | 1.0<br>(0.2) | 1.1<br>(0.2) | 1.0<br>(0.3) | 1.0<br>(0.3) | 0.10                           |

|  |              |              |              |              |              |                   |
|--|--------------|--------------|--------------|--------------|--------------|-------------------|
|  | 5HT1AR       | 1.0<br>(0.6) | 1.2<br>(0.6) | 1.2<br>(0.6) | 1.1<br>(0.5) | 0.50              |
|  | SERT         | 1.0<br>(0.5) | 1.1<br>(0.5) | 1.0<br>(0.9) | 0.9<br>(0.6) | 0.03              |
|  | TH           | 0.9<br>(0.7) | 0.9<br>(0.5) | 0.9<br>(1.0) | 0.9<br>(0.6) | 0.97              |
|  | DAT          | 0.6<br>(1.2) | 1.2<br>(1.3) | 0.8<br>(0.5) | 0.4<br>(0.1) | 0.0009            |
|  | BDNF         | 1.1<br>(0.2) | 1.0<br>(0.2) | 1.0<br>(0.2) | 1.0<br>(0.3) | 0.34              |
|  | CREB         | 1.0<br>(0.3) | 1.1<br>(0.3) | 1.1<br>(0.5) | 1.0<br>(0.4) | 0.52              |
|  | IFN $\gamma$ | 0.9<br>(1.3) | 0.4<br>(0.2) | 0.8<br>(1.0) | 0.9<br>(1.0) | 0.16              |
|  | IL-1 $\beta$ | 1.0<br>(0.6) | 0.5<br>(0.4) | 0.8<br>(0.8) | 0.4<br>(0.5) | 0.02 <sup>a</sup> |
|  | TNF $\alpha$ | 0.9<br>(0.4) | 1.0<br>(0.5) | 1.0<br>(0.5) | 0.7<br>(0.9) | 0.18              |

Table S3 : Comparison of brain markers using the Kruskal-Wallis test. Results are expressed as median of  $2e\Delta\Delta Ct$  (interquartile range), n = 11-14. <sup>a</sup> Despite the Kruskal-Wallis significance, the Dunn post hoc test did not reveal any significant difference between groups.

| Gut regions | Marker       | NS-PBS       | S-PBS        | NS-Probio    | S-Probio     | Kruskal-Wallis test<br>P value |
|-------------|--------------|--------------|--------------|--------------|--------------|--------------------------------|
| Ileum       | IL-1 $\beta$ | 0.9<br>(1.2) | 1.0<br>(0.6) | 1.2<br>(0.7) | 1.0<br>(1.2) | 0.81                           |
|             | TNF $\alpha$ | 0.8<br>(0.8) | 0.8<br>(0.6) | 1.1<br>(0.9) | 0.5<br>(0.8) | 0.23                           |
|             | IFN $\gamma$ | 0.8<br>(1.3) | 0.9<br>(1.2) | 0.6<br>(0.6) | 0.8<br>(0.6) | 0.73                           |
|             | Claudin-2    | 1.0<br>(0.2) | 0.9<br>(0.4) | 0.9<br>(0.6) | 0.9<br>(0.3) | 0.78                           |
|             | Occludin     | 1.0<br>(0.6) | 1.3<br>(0.5) | 1.2<br>(0.6) | 1.3<br>(0.8) | 0.65                           |
|             | ZO-1         | 1.3<br>(0.3) | 1.0<br>(0.1) | 1.0<br>(0.3) | 1.1<br>(0.3) | 0.13                           |
|             | MLCK         | 1.0<br>(0.6) | 0.8<br>(0.9) | 1.0<br>(0.7) | 1.0<br>(1.1) | 0.97                           |
| Colon       | IL-1 $\beta$ | 1.0<br>(0.6) | 0.9<br>(0.4) | 1.2<br>(0.8) | 0.8<br>(0.5) | 0.19                           |
|             | TNF $\alpha$ | 0.9<br>(0.7) | 0.8<br>(0.6) | 1.3<br>(1.3) | 0.8<br>(0.5) | 0.26                           |
|             | IFN $\gamma$ | 1.0<br>(0.4) | 1.1<br>(0.4) | 1.5<br>(1.4) | 1.0<br>(0.5) | 0.18                           |
|             | Claudin-2    | 0.9<br>(0.6) | 0.9<br>(0.4) | 1.0<br>(0.6) | 1.3<br>(0.7) | 0.066                          |
|             | Occludin     | 1.0<br>(0.5) | 0.9<br>(0.5) | 0.9<br>(0.6) | 1.1<br>(0.5) | 0.51                           |
|             | ZO-1         | 1.0<br>(0.2) | 1.0<br>(0.3) | 0.9<br>(0.3) | 1.1<br>(0.2) | 0.15                           |
|             | MLCK         | 1.0<br>(0.6) | 0.6<br>(0.6) | 0.6<br>(0.3) | 0.5<br>(0.7) | 0.17                           |

Table S4 : Comparison of inflammation and gut permeability using the Kruskal-Wallis test. Results are expressed as median of 2e $\Delta\Delta$ Ct (interquartile range), n = 12-14.

| Taxa level | Taxa                  | S-PBS vs NS-PBS<br>p-value | Taxa                      | S-Probio vs NS-Probio<br>p-value | Taxa                     | S-Probio vs S-PBS<br>p-value |
|------------|-----------------------|----------------------------|---------------------------|----------------------------------|--------------------------|------------------------------|
| Family     | Verrucomicrobiaceae   | p= 0.007                   | <b>Bacteroidaceae</b>     | p= 0.0001 *                      | Rikenellaceae            | p= 0.0072                    |
|            | <b>Bacteroidaceae</b> | p= 0.014                   | Bdellovibrionaceae        | p= 0.0123                        | <b>Staphylococcaceae</b> | p= 0.0085                    |
|            |                       |                            | Desulfovibrionaceae       | p= 0.258                         |                          |                              |
|            |                       |                            | <b>Staphylococcaceae</b>  | p= 0.0313                        |                          |                              |
| Genus      | <i>Akkermansia</i>    | p= 0.007                   | <b>Bacteroides</b>        | p= 0.0001 *                      | <i>Ruminococcus</i>      | p= 0.0203                    |
|            | <i>Allobaculum</i>    | p= 0.0079                  | <b>Ruminococcus2</b>      | p= 0.0082                        | <i>Alistipes</i>         | p= 0.0072                    |
|            | <b>Bacteroides</b>    | p= 0.014                   | <b>Coprobacter</b>        | p= 0.0063                        | <b>Staphylococcus</b>    | p= 0.0085                    |
|            | <i>Olsenella</i>      | p= 0.0194                  | <i>Olsenella</i>          | p= 0.0096                        |                          |                              |
|            | <i>Gemmiger</i>       | p= 0.0258                  | <b>Catenibacterium</b>    | p= 0.0104                        |                          |                              |
|            | <b>Butyrivibrio</b>   | p= 0.0291                  | <i>Vampirovibrio</i>      | p= 0.0123                        |                          |                              |
|            | <i>Coprococcus</i>    | p= 0.0326                  | <i>Bilophila</i>          | p= 0.0203                        |                          |                              |
|            |                       |                            | <i>Anaerosporbacter</i>   | p= 0.0228                        |                          |                              |
|            |                       |                            | <b>Macellibacteroides</b> | p= 0.0256                        |                          |                              |
|            |                       |                            | <i>Clostridium IV</i>     | p= 0.0291                        |                          |                              |
|            |                       |                            | <b>Staphylococcus</b>     | p= 0.0313                        |                          |                              |
|            |                       |                            | <i>Coprococcus</i>        | p= 0.0366                        |                          |                              |
|            |                       |                            | <i>Murimonas</i>          | p= 0.0366                        |                          |                              |
|            |                       |                            | <i>Sporobacter</i>        | p= 0.0456                        |                          |                              |

Table S5 : Relative abundance significantly regulated between treatments at week 6. \* indicates a (FDR-adjusted p-value) q-value <0.01, bold indicates a higher relative abundance in the first group

|                   | Marker                                                | NS-PBS         | S-PBS          | NS-Probio      | S-Probio       | Kruskal-Wallis test<br>P value |
|-------------------|-------------------------------------------------------|----------------|----------------|----------------|----------------|--------------------------------|
| Faeces            | Total SCFAs<br>( $\mu\text{mol/g}$ caecal<br>content) | 11.4<br>(4.7)  | 8.5<br>(5.4)   | 12.9<br>(9.6)  | 6.9<br>(5.2)   | 0.019                          |
|                   | % Acetate                                             | 74.9<br>(3.7)  | 80.0<br>(8.9)  | 75.1<br>(6.0)  | 81.3<br>(16.4) | 0.17                           |
|                   | % Propionate                                          | 13.0<br>(6.3)  | 10.1<br>(4.2)  | 10.3<br>(6.3)  | 10.8<br>(5.9)  | 0.24                           |
|                   | % Butyrate                                            | 8.4<br>(4.8)   | 8.0<br>(5.3)   | 12.4<br>(6.2)  | 8.4<br>(10.5)  | 0.20                           |
|                   | % Iso-SCFAs                                           | 1.1<br>(1.2)   | 0.9<br>(0.8)   | 1.2<br>(1.0)   | 0.7<br>(0.5)   | 0.49                           |
| Caecum<br>content | Total SCFAs<br>( $\mu\text{mol/g}$ caecal<br>content) | 42.3<br>(20.7) | 32.7<br>(19.4) | 32.7<br>(10.8) | 30.6<br>(10.0) | 0.28                           |
|                   | % Acetate                                             | 65.7<br>(2.7)  | 60.9<br>(4.8)  | 63.6<br>(4.9)  | 60.9<br>(4.7)  | 0.014                          |
|                   | % Propionate                                          | 10,68<br>(2.2) | 11,73<br>(3.8) | 13,72<br>(3.7) | 12,49<br>(4.6) | 0.044                          |
|                   | % Butyrate                                            | 0.7<br>(0.2)   | 0.8<br>(0.4)   | 0.9<br>(0.3)   | 0.8<br>(0.5)   | 0.21                           |
|                   | % Iso-SCFAs                                           | 1.3<br>(0.4)   | 1.4<br>(0.8)   | 1.7<br>(0.6)   | 1.5<br>(1.1)   | 0.16                           |

Table S6 : Comparison of total SCFAs and percentages of acetate, propionate, butyrate and iso-SCFAs using the Kruskal-Wallis test. Results are expressed as median (interquartile range), n = 13-14.
